# Supplementary material for: Breastfeeding duration is associated with larger cortical gray matter volumes in children from the ABCD study
Source: bioRxiv or medRxiv preprint supplement (doi:10.1101/2022.05.23.22274926), 2022-05-24
Supplement: Supplementary file [file media-2.pdf]

**Supplementary Table 2.** Provenance and summary measures of the behavioral data used for the mediation analyses.

| <b>Variable name</b>              | <b>N</b> | <b>ABCD document</b>                                                      | <b>ABCD variable name</b>                                                                         | <b>Median (IQR) [Min – Max]</b> |
|-----------------------------------|----------|---------------------------------------------------------------------------|---------------------------------------------------------------------------------------------------|---------------------------------|
| Global cognition                  | 7,711    | abcd_tbss01                                                               | nihtbx_totalcomp_uncorrected                                                                      | 87 (12) [49 – 117]              |
| Total behavioral problems         | 7,857    | abcd_cbcls01                                                              | cbcl_scr_syn_totprob_r                                                                            | 12 (19) [0 – 139]               |
| Internalizing behavioral problems | 7,857    | abcd_cbcls01                                                              | cbcl_scr_syn_internal_r                                                                           | 3 (6) [0 – 51]                  |
| Externalizing behavioral problems | 7,857    | abcd_cbcls01                                                              | cbcl_scr_syn_external_r                                                                           | 2 (6) [0 – 49]                  |
| Psychotic experiences             | 7,851    | pps01                                                                     | Sum of prodromal_1_y to prodromal_21_y                                                            | 1 (4) [0 – 21]                  |
| Troubling psychotic experiences   | 7,851    | pps01                                                                     | Sum of prodromal_1b_y to prodromal_21b_y                                                          | 0 (3) [0 – 78]                  |
| Vocabulary                        | 7,770    | abcd_tbss01                                                               | nihtbx_picvocab_uncorrected                                                                       | 84 (10) [36 – 119]              |
| Prosociality                      | 7,815    | abcd_psb01 (participants' questionnaire) / psb01 (parents' questionnaire) | Sum of prosocial_q1_y to prosocial_q3_y (abcd_psb01) and prosocial_q1_p to prosocial_q3_p (psb01) | 11 (3) [1 – 12]                 |
| Total impulsivity                 | 7,840    | abcd_upps01                                                               | Sum of upps6_y to upps39_y                                                                        | 41 (11) [20 – 73]               |
| Lack of premeditation             | 7,840    | abcd_upps01                                                               | Sum of upps6_y, upps16_y, upps23_y, and upps28_y                                                  | 8 (3) [4 – 16]                  |
| Lack of perseverance              | 7,847    | abcd_upps01                                                               | Sum of upps15_y, upps19_y, upps22_y, and upps24_y                                                 | 7 (3) [4 – 16]                  |
| Negative urgency                  | 7,846    | abcd_upps01                                                               | Sum of upps7_y, upps11_y, upps17_y, and upps20_y                                                  | 8 (3) [4 – 16]                  |
| Positive urgency                  | 7,847    | abcd_upps01                                                               | Sum of upps35_y, upps36_y, upps37_y, and upps39_y                                                 | 8 (5) [4 – 16]                  |
| Sensation seeking                 | 7,847    | abcd_upps01                                                               | Sum of upps12_y, upps18_y, upps21_y, and upps27_y                                                 | 10 (4) [4 – 16]                 |
