# Supplementary material for: Breastfeeding duration is associated with larger cortical gray matter volumes in children from the ABCD study
Source: bioRxiv or medRxiv preprint supplement (doi:10.1101/2022.05.23.22274926), 2022-05-24
Supplement: Supplementary file [file media-3.pdf]

**Supplementary Table 3.** Results of all the mediation analyses. We used breastfeeding duration as the independent variable (X), the GM volume of the left POrb/IOFC cluster volume or global GM volume as the mediator (M), and behavioral scores as the dependent variable (Y). We report the standardized coefficients ( $\beta$ ) and standard errors (SE).

| <b>Behavioral variable (Y)</b>     | <b>Mediator (M)</b>           | <b>X → M → Y (Indirect effect)</b>                    | <b>X → M</b>                                    | <b>M → Y</b>                                     | <b>X → Y (Direct effect)</b>                     | <b>X → Y (Total effect)</b>                      |
|------------------------------------|-------------------------------|-------------------------------------------------------|-------------------------------------------------|--------------------------------------------------|--------------------------------------------------|--------------------------------------------------|
| Global cognition                   | Left POrb/IOFC cluster volume | $\beta = 0.0010$<br>BootSE = 0.0010<br>$p = 0.2745$   | $\beta = 0.0672$<br>SE = 0.0080<br>$p < 0.0001$ | $\beta = 0.0152$<br>SE = 0.0141<br>$p = 0.2818$  | $\beta = 0.1052$<br>SE = 0.0101<br>$p < 0.0001$  | $\beta = 0.1061$<br>SE = 0.0101<br>$p < 0.0001$  |
| Global cognition                   | Global GM volume              | $\beta = 0.0002$<br>BootSE = 0.0005<br>$p = 0.6859$   | $\beta = 0.0165$<br>SE = 0.0037<br>$p < 0.0001$ | $\beta = 0.0116$<br>SE = 0.0306<br>$p = 0.7053$  | $\beta = 0.1059$<br>SE = 0.0101<br>$p < 0.0001$  | $\beta = 0.1061$<br>SE = 0.0101<br>$p < 0.0001$  |
| Total behavioral problems          | Left POrb/IOFC cluster volume | $\beta = -0.0010$<br>BootSE = 0.0011,<br>$p = 0.3372$ | $\beta = 0.0676$<br>SE = 0.0079<br>$p < 0.0001$ | $\beta = -0.0153$<br>SE = 0.0162<br>$p = 0.3444$ | $\beta = -0.0229$<br>SE = 0.0116<br>$p = 0.0489$ | $\beta = -0.0238$<br>SE = 0.0116<br>$p = 0.0398$ |
| Total behavioral problems*         | Global GM volume              | $\beta = -0.0019$<br>BootSE = 0.0007<br>$p = 0.0017$  | $\beta = 0.0167$<br>SE = 0.0037<br>$p < 0.0001$ | $\beta = -0.1131$<br>SE = 0.0352<br>$p = 0.0013$ | $\beta = -0.0219$<br>SE = 0.0116<br>$p = 0.0588$ | $\beta = -0.0238$<br>SE = 0.0116<br>$p = 0.0398$ |
| Internalizing behavioral problems  | Global GM volume              | $\beta = -0.0013$<br>BootSE = 0.0006<br>$p = 0.0237$  | $\beta = 0.0167$<br>SE = 0.0037<br>$p < 0.0001$ | $\beta = -0.0769$<br>SE = 0.0356<br>$p = 0.0308$ | $\beta = 0.0170$<br>SE = 0.0117<br>$p = 0.1459$  | $\beta = 0.0157$<br>SE = 0.0117<br>$p = 0.1787$  |
| Externalizing behavioral problems* | Global GM volume              | $\beta = -0.0020$<br>BootSE = 0.0007,<br>$p = 0.0009$ | $\beta = 0.0167$<br>SE = 0.0037<br>$p < 0.0001$ | $\beta = -0.1203$<br>SE = 0.0352<br>$p = 0.0006$ | $\beta = -0.0423$<br>SE = 0.0116<br>$p = 0.0003$ | $\beta = -0.0444$<br>SE = 0.0116<br>$p = 0.0001$ |
| Psychotic experiences              | Left POrb/IOFC cluster volume | $\beta = -0.0016$<br>BootSE = 0.0011<br>$p = 0.1193$  | $\beta = 0.0676$<br>SE = 0.0079<br>$p < 0.0001$ | $\beta = -0.0243$<br>SE = 0.0158<br>$p = 0.1249$ | $\beta = -0.0534$<br>SE = 0.0113<br>$p < 0.0001$ | $\beta = -0.0549$<br>SE = 0.0113<br>$p < 0.0001$ |

| <b>Behavioral variable (Y)</b>  | <b>Mediator (M)</b>           | <b>X → M → Y (Indirect effect)</b>                    | <b>X → M</b>                                    | <b>M → Y</b>                                     | <b>X → Y (Direct effect)</b>                     | <b>X → Y (Total effect)</b>                      |
|---------------------------------|-------------------------------|-------------------------------------------------------|-------------------------------------------------|--------------------------------------------------|--------------------------------------------------|--------------------------------------------------|
| Psychotic experiences           | Global GM volume              | $\beta = -0.0015$<br>BootSE = 0.0007<br>$p = 0.0068$  | $\beta = 0.0166$<br>SE = 0.0037<br>$p < 0.0001$ | $\beta = -0.0902$<br>SE = 0.0344<br>$p = 0.0087$ | $\beta = -0.0533$<br>SE = 0.0113<br>$p < 0.0001$ | $\beta = -0.0549$<br>SE = 0.0113<br>$p < 0.0001$ |
| Troubling psychotic experiences | Left POrb/IOFC cluster volume | $\beta = -0.0024$<br>BootSE = 0.0011<br>$p = 0.0239$  | $\beta = 0.0676$<br>SE = 0.0079<br>$p < 0.0001$ | $\beta = -0.0358$<br>SE = 0.0161<br>$p = 0.0260$ | $\beta = -0.0463$<br>SE = 0.0115<br>$p < 0.0001$ | $\beta = -0.0485$<br>SE = 0.0115<br>$p < 0.0001$ |
| Troubling psychotic experiences | Global GM volume              | $\beta = -0.0010$<br>BootSE = 0.0006,<br>$p = 0.0789$ | $\beta = 0.0166$<br>SE = 0.0037<br>$p < 0.0001$ | $\beta = -0.0582$<br>SE = 0.0350<br>$p = 0.0966$ | $\beta = -0.0475$<br>SE = 0.0115<br>$p < 0.0001$ | $\beta = -0.0485$<br>SE = 0.0115<br>$p < 0.0001$ |
| Vocabulary                      | Left POrb/IOFC cluster volume | $\beta = 0.0008$<br>BootSE = 0.0010<br>$p = 0.3902$   | $\beta = 0.0667$<br>SE = 0.0080<br>$p < 0.0001$ | $\beta = 0.0120$<br>SE = 0.0142<br>$p = 0.3976$  | $\beta = 0.1243$<br>SE = 0.0102<br>$p < 0.0001$  | $\beta = 0.1251$<br>SE = 0.0102<br>$p < 0.0001$  |
| Prosociality                    | Left POrb/IOFC cluster volume | $\beta = 0.0020$<br>BootSE = 0.0011<br>$p = 0.0606$   | $\beta = 0.0673$<br>SE = 0.0080<br>$p < 0.0001$ | $\beta = 0.0300$<br>SE = 0.0162<br>$p = 0.0643$  | $\beta = 0.0144$<br>SE = 0.0116<br>$p = 0.2144$  | $\beta = 0.0162$<br>SE = 0.0116<br>$p = 0.1613$  |
| Total impulsivity               | Left POrb/IOFC cluster volume | $\beta = -0.0022$<br>BootSE = 0.0011<br>$p = 0.0464$  | $\beta = 0.0675$<br>SE = 0.0079<br>$p < 0.0001$ | $\beta = -0.0320$<br>SE = 0.0163<br>$p = 0.0496$ | $\beta = -0.0231$<br>SE = 0.0117<br>$p = 0.0484$ | $\beta = -0.0250$<br>SE = 0.0116<br>$p = 0.0319$ |
| Lack of premeditation           | Left POrb/IOFC cluster volume | $\beta = -0.0001$<br>BootSE = 0.0011<br>$p = 0.9326$  | $\beta = 0.0675$<br>SE = 0.0079<br>$p < 0.0001$ | $\beta = -0.0014$<br>SE = 0.0164<br>$p = 0.9336$ | $\beta = -0.0158$<br>SE = 0.0118<br>$p = 0.1816$ | $\beta = -0.0158$<br>SE = 0.0118<br>$p = 0.1778$ |
| Lack of perseverance            | Left POrb/IOFC cluster volume | $\beta = -0.0013$<br>BootSE = 0.0011<br>$p = 0.2426$  | $\beta = 0.0672$<br>SE = 0.0079<br>$p < 0.0001$ | $\beta = -0.0190$<br>SE = 0.0165<br>$p = 0.2498$ | $\beta = 0.0215$<br>SE = 0.0118<br>$p = 0.0695$  | $\beta = 0.0204$<br>SE = 0.0118<br>$p = 0.0845$  |
| Negative urgency*               | Left POrb/IOFC cluster volume | $\beta = -0.0034$<br>BootSE = 0.0012<br>$p = 0.0018$  | $\beta = 0.0672$<br>SE = 0.0079<br>$p < 0.0001$ | $\beta = -0.0511$<br>SE = 0.0164<br>$p = 0.0019$ | $\beta = -0.0195$<br>SE = 0.0118<br>$p = 0.0983$ | $\beta = -0.0225$<br>SE = 0.0117<br>$p = 0.0552$ |

| <b>Behavioral variable (Y)</b> | <b>Mediator (M)</b>           | <b>X → M → Y (Indirect effect)</b>                   | <b>X → M</b>                                    | <b>M → Y</b>                                     | <b>X → Y (Direct effect)</b>                     | <b>X → Y (Total effect)</b>                      |
|--------------------------------|-------------------------------|------------------------------------------------------|-------------------------------------------------|--------------------------------------------------|--------------------------------------------------|--------------------------------------------------|
| Positive urgency               | Left POrb/IOFC cluster volume | $\beta = -0.0018$<br>BootSE = 0.0011<br>$p = 0.0889$ | $\beta = 0.0672$<br>SE = 0.0079<br>$p < 0.0001$ | $\beta = -0.0273$<br>SE = 0.0163<br>$p = 0.0937$ | $\beta = -0.0642$<br>SE = 0.0117<br>$p < 0.0001$ | $\beta = -0.0658$<br>SE = 0.0116<br>$p < 0.0001$ |
| Sensation seeking              | Left POrb/IOFC cluster volume | $\beta = 0.0004$<br>BootSE = 0.0011<br>$p = 0.7048$  | $\beta = 0.0672$<br>SE = 0.0079<br>$p < 0.0001$ | $\beta = 0.0061$<br>SE = 0.0163<br>$p = 0.7090$  | $\beta = 0.0178$<br>SE = 0.0117<br>$p = 0.1298$  | $\beta = 0.0181$<br>SE = 0.0117<br>$p = 0.1208$  |

\* Denotes significant indirect effects after Bonferroni correction [ $p < 0.0028$  (0.05 / 18)]
